# Supplementary material
Source: publisher figshare collection journal article supplement (https://acs.figshare.com/ndownloader/files/15073784)
Supplement: Supplementary file 1 [file 15073784]

# Impact of the Silica Surface Nanoconfinement on the Microstructure of Alkoxysilane Layers Grafted by Supercritical Carbon Dioxide

*Diane Rébiscoul<sup>†~</sup>, Susan Sananes Israel<sup>†</sup>, Samuel Tardif<sup>‡</sup>, Vincent Larrey<sup>#</sup>, André Ayrals<sup>§</sup>, Francois Rieutord<sup>‡</sup>*

<sup>†</sup> CEA, ICSM – UMR 5257 CEA-CNRS-UM-ENSCM, 30207 Bagnols-sur-Cèze Cedex, France

<sup>‡</sup> Univ. Grenoble Alpes, CEA, IRIG-MEM, F-38000 Grenoble, France

<sup>#</sup> Univ. Grenoble Alpes, CEA, LETI, F-38000 Grenoble, France

<sup>§</sup> Institut Européen des Membranes, IEM, UMR-5635, Université de Montpellier, ENSCM, CNRS, Place Eugène Bataillon, 34095 Montpellier cedex 5, France

<sup>~</sup>Corresponding author: [diane.rebiscoul@cea.fr](mailto:diane.rebiscoul@cea.fr)

**Table S1.** Physicochemical properties of the grafted molecules. Molecule length  $l_{al}$  is calculated using ChemSketch software and from<sup>16</sup>.  $\rho_{eal}$  is calculated for each molecule as  $\rho_{eal} = \rho_m \frac{\sum_i c_j Z_j}{\sum_i c_j A_j}$ , where  $c_j$  is the amount of element  $j$  in the material,  $Z_j$  is the atomic number,  $A_j$  is the atomic mass and  $\rho_m$  (g.Å<sup>-3</sup>) is the mass density.

| Molecule                           | MPTMS                                                                             | AEAPTMS                                                                            | IPTES                                                                               |
|------------------------------------|-----------------------------------------------------------------------------------|------------------------------------------------------------------------------------|-------------------------------------------------------------------------------------|
| Chemical formula                   | 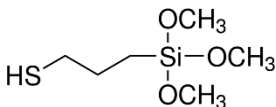 |  |  |
| $\rho_m$ (g.cm <sup>-3</sup> )     | 1.01                                                                              | 1.06                                                                               | 1.48                                                                                |
| $\rho_{eal}$ (e-.Å <sup>-3</sup> ) | 0.33                                                                              | 0.34                                                                               | 0.40                                                                                |
| $l_{al}$ (Å)                       | 10                                                                                | 12 <sup>15</sup>                                                                   | 10                                                                                  |

**Table S2.** Thickness  $th$  and electron density  $\rho_e$  of the layer grafted obtained from the simulation of the X-ray reflectivity curves from<sup>16</sup>.

| Sample  | Molecule | T (°C) | $th$ (Å) | $\rho_e$ (e-.Å <sup>-3</sup> ) | Roughness grafted layer (Å) |
|---------|----------|--------|----------|--------------------------------|-----------------------------|
| MPT-60  | MPTMS    | 60     | 13.6     | 0.326                          | 3                           |
| AEA-60  | AEAPTMS  | 60     | 11.1     | 0.272                          | 8                           |
| IPT-100 | IPTMS    | 100    | 17.8     | 0.407                          | 2                           |

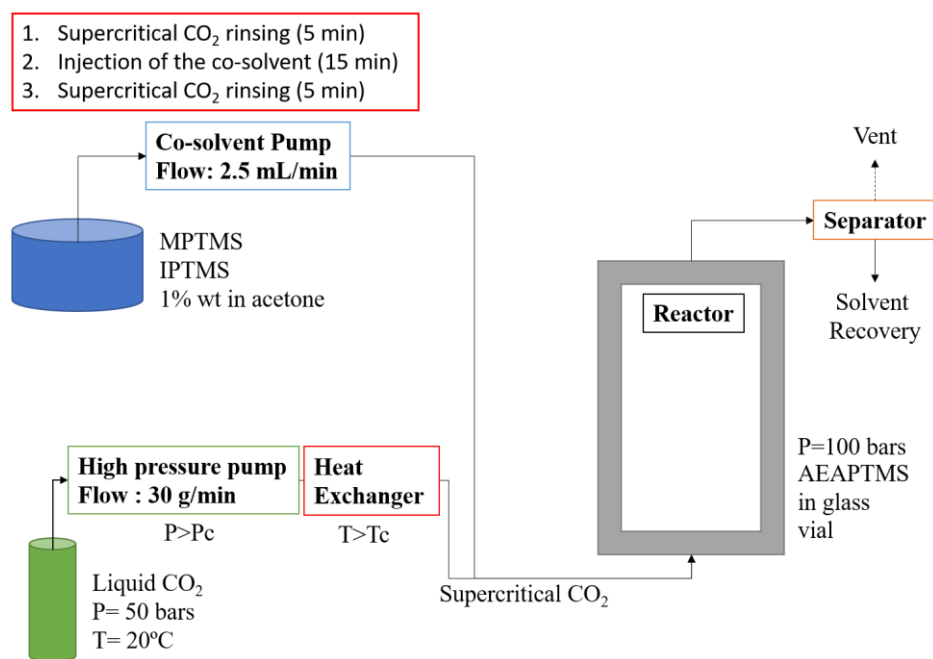

**Figure S1:** Experimental setup of the SC CO<sub>2</sub> grafting process.

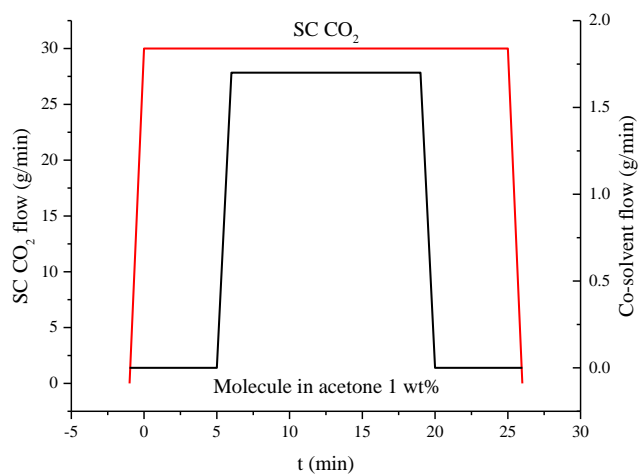

**Figure S2.** SC CO<sub>2</sub> and solvent flow applied during the SC CO<sub>2</sub> grafting process with MPTMS and IPTMS molecules.

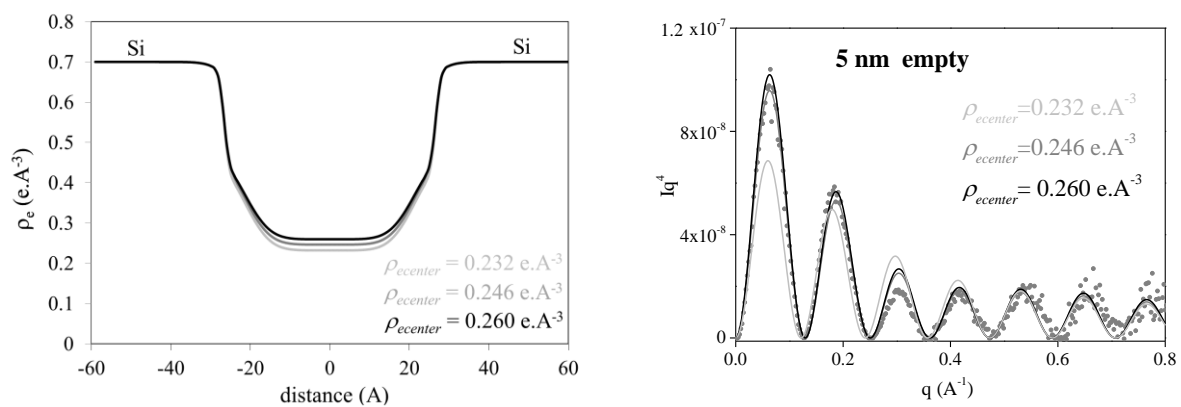

**Figure S3.** Impact of the variation of the electron density in the center of the nanochannels  $\rho_{center}$  of  $\pm 0.014$  e.Å<sup>-3</sup> on X-ray reflectivity curves.

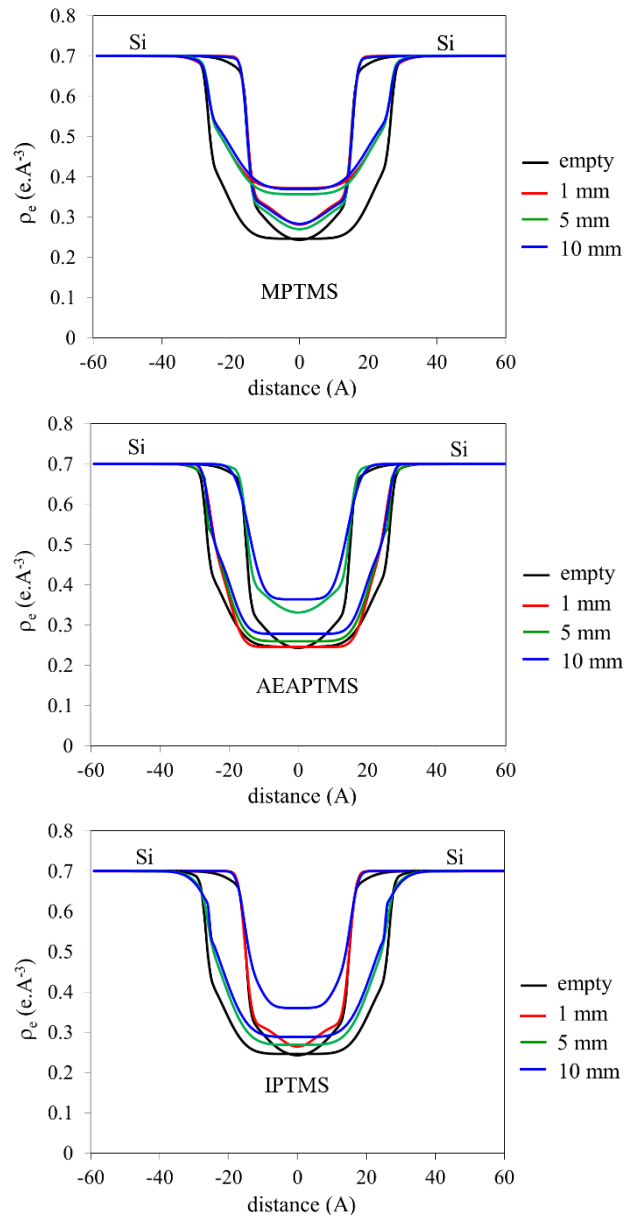

**Figure S4:** Electron density profiles obtained from the model used for the fitting of the experimental X-ray reflectivity curves of the samples before and after SC CO<sub>2</sub> grafting processes with MPTMS, AEAPTMS and IPTMS at 1, 5 and 10 mm from the entrance of the 3 and 5 nm nanochannels networks.

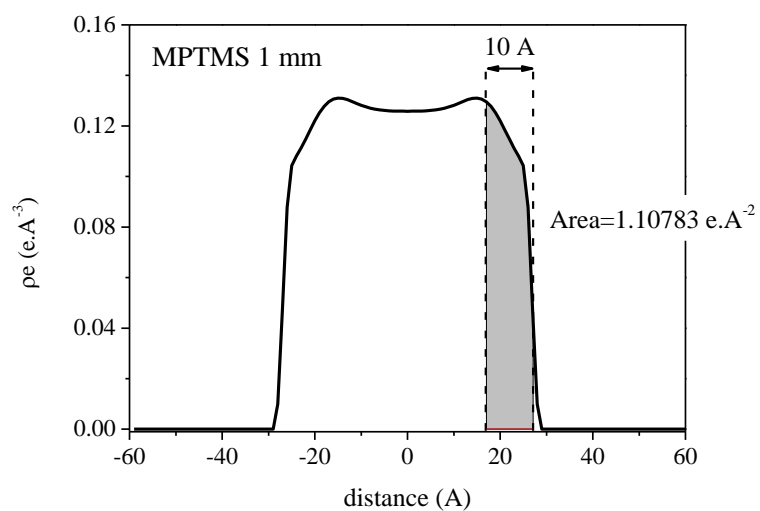

**Figure S5:** Example of the area determination taking into account the surface density of electron on a distance corresponding to the molecule length for 5 nm nanochannels network grafted with MPTMS at 1 mm from the nanochannels network entrance.

### SI1. Origin of the electron density profile: grafted silica surface of Si wafer or/and grafted silica surface of SiO<sub>2</sub> nanochannels

In order to determine if the added electron density in the nanochannels after the SC CO<sub>2</sub> process is mainly due to the alkoxysilanes grafting on the silica surface of Si wafer (top and bottom) and/or on the side silica surface of SiO<sub>2</sub> nanochannels (Figure S6), the two electron densities were calculated supposing a monolayer grafting. The first one is the electron density of a monolayer grafted on the silica of the Si wafer  $\rho_{ew}$ . The second one is the electron density of a monolayer on the silica surface of the SiO<sub>2</sub> nanochannels  $\rho_{en}$ .

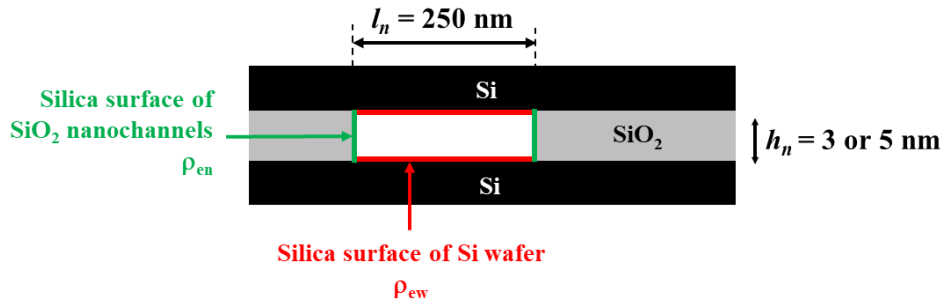

**Figure S6:** Description of the parameters used to calculate the electron density of a monolayer on the various silica surface of the nanochannels.

Thus, considering that the accessible surface of silica on Si wafer contributes to 50 % of the total surface in the nanochannels (50% of the Si wafer is covered by the SiO<sub>2</sub> nanochannels), the electron density of a monolayer grafted on the silica of the Si wafer can be written as  $\rho_{ew}(1)$  :

$$\rho_{ew} = \rho_{eal}/2 \quad (1)$$

With  $\rho_{eal}$  (e.Å<sup>-3</sup>), the electron density of the liquid alkoxysilane (Table S1) or the density of the grafted layer measured in <sup>16</sup>.

The electron density of a grafted layer on the silica surface of the SiO<sub>2</sub> nanochannels can be calculated from the number of electrons in the grafted monolayer  $n_{en}$  (2):

$$n_{en} = 2\rho_{eal} \cdot l_{al} \cdot L \cdot h_n$$

(2)

with  $l_{al}$  (Å) the thickness of the grafted layer,  $L$  (Å) the sample length and  $h_n$  (Å) the height of the nanochannels.

Considering the volume of a nanochannel  $v$  (Å<sup>3</sup>) (3):

$$v = l_n L \cdot h_n$$

(3)

With  $l_n$  (Å) the width of one nanochannels and taking into account that SiO<sub>2</sub> nanochannels contribute to 50 % of the total volume of the nanochannels, the electron density of a grafted layer on the silica surface  $\rho_{en}$  (e.Å<sup>-3</sup>) of the nanochannels can be written as (4):

$$\rho_{en} = \frac{\rho_{eal} \cdot l_{al}}{l_n}$$

(4)

These values were calculated following two approaches. First,  $\rho_{ew}$  and  $\rho_{en}$  were determined considering the grafted layer thickness as the molecule length and the mass density of the liquid alkoxysilane  $\rho_{eal}$  (e.Å<sup>-3</sup>) (Table S1). Second,  $\rho_{ew}^*$  and  $\rho_{en}^*$  were calculated from the thickness and the density obtained by X-ray reflectivity for a layer grafted on a large flat surface<sup>16</sup>. The obtained values are presented in the Table S3.



**Table S3 :** Electron densities of a monolayer grafted on the silica of the Si wafer  $\rho_{ew}$  and electron density of a monolayer on the silica surface of the SiO<sub>2</sub> nanochannels  $\rho_{en}$ .  $\rho_{ew}$  and  $\rho_{en}$  were calculated from Tablea SI and  $\rho_{ew}^*$  and  $\rho_{en}^*$  were calculated from <sup>16</sup>.

|         | $\rho_{ew}$ (e.A <sup>-3</sup> ) | $\rho_{ew}^*$ (e.A <sup>-3</sup> ) | $\rho_{en}$ (e.A <sup>-3</sup> ) | $\rho_{en}^*$ (e.A <sup>-3</sup> ) |
|---------|----------------------------------|------------------------------------|----------------------------------|------------------------------------|
| MPTMS   | 0.166                            | 0.163                              | 0.001                            | 0.002                              |
| AEAPTMS | 0.170                            | 0.136                              | 0.003                            | 0.001                              |
| IPTES   | 0.201                            | 0.142                              | 0.002                            | 0.002                              |

As presented in Table S3, the  $\rho_{en}$  values are negligible regarding  $\rho_{ew}$ , and represent at a maximum 2 % of the  $\Delta\rho_e$  shown in Figure 5. This is not surprising considering the high aspect ratio of the channels (3-5 nm high, 250 nm wide). Consequently, the added electron densities in the nanochannels presented in Figure 5 are mainly due to the alkoxysilanes grafted at the silica surface of the Si wafer.
